# Supplementary material for: Synthesis of Epoxy Methacrylate Resin and Coatings Preparation by Cationic and Radical Photocrosslinking
Source: MDPI journal article supplement (doi:10.3390/molecules26247663), 2021-12-17
Supplement: s1 [file s1]

# Supplementary Materials: Synthesis of epoxy methacrylate resin and coatings preparation by cationic and radical photo-crosslinking

Paulina Bednarczyk <sup>1,\*</sup>, Izabela Irska <sup>2</sup>, Konrad Gziut <sup>1</sup> and Paula Ossowicz-Rupniewska <sup>1</sup>

<sup>1</sup> West Pomeranian University of Technology in Szczecin, Faculty of Chemical Technology and Engineering, Department of Chemical Organic Technology and Polymeric Materials, Piastów Ave. 42, 71-065 Szczecin, Poland

<sup>2</sup> West Pomeranian University of Technology in Szczecin, Faculty of Mechanical Engineering and Mechatronics, Department of Materials Technology, Piastów 19 Avenue, 70-310 Szczecin, Poland

\* Correspondence: bednarczyk.pb@gmail.com or paulina.bednarczyk@zut.edu.pl

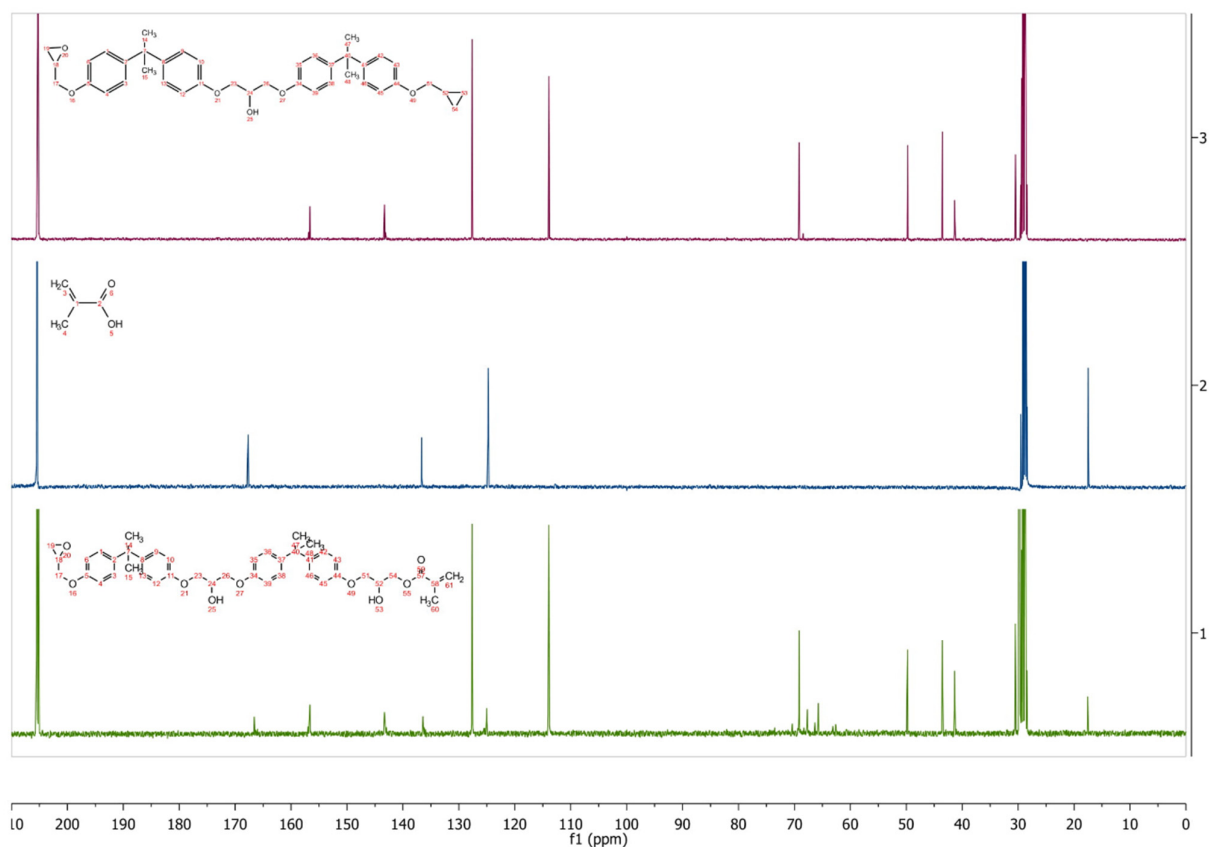

**Figure S1.** <sup>13</sup>C NMR spectra (d-acetone) of epoxy resin, methacrylic acid, and EA prepolymer.
